# Supplementary material for: Gestational Exposure to Phthalates and Phthalate Replacements in Relation to Neurodevelopmental Delays in Early Childhood
Source: MDPI journal article supplement (doi:10.3390/toxics11010065), 2023-01-11
Supplement: s1 [file s1]

# Supplementary Materials

## Title

Gestational exposure to phthalates and phthalate replacements in relation to neurodevelopmental delays in early childhood

## Authors

Seonyoung Park, Emily Zimmerman, Gredia Huerta-Montañez, Zaira Rosario Pabon, Carmen M. Vélez-Vega, José F. Cordero, Akram Alshawabkeh, John D. Meeker, Deborah J. Watkins

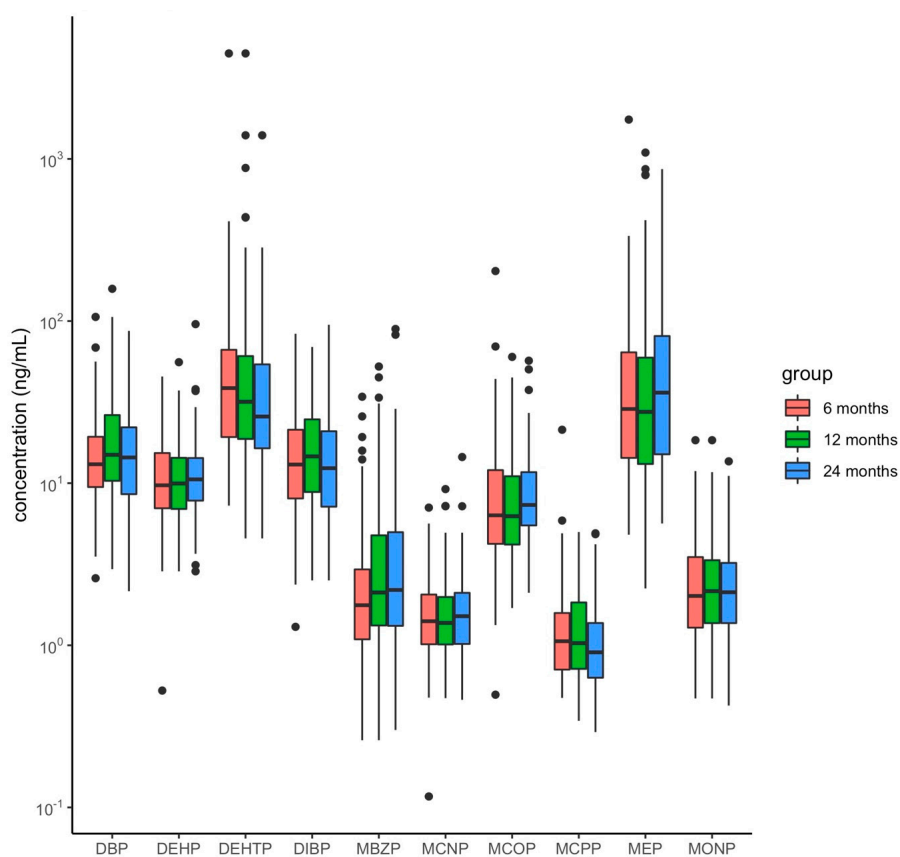

**Figure S1.** Distribution of prenatal phthalate concentration averaged over gestation by age group.

**Table S1.** Demographic characteristics of study sample (N=274).

|                            |                       | 6 months      |                  |                | 12 months      |                  |                | 24 months      |                  |                |
|----------------------------|-----------------------|---------------|------------------|----------------|----------------|------------------|----------------|----------------|------------------|----------------|
|                            |                       | All<br>(n=98) | Female<br>(n=49) | Male<br>(n=49) | All<br>(n=130) | Female<br>(n=64) | Male<br>(n=66) | All<br>(n=123) | Female<br>(n=69) | Male<br>(n=54) |
| Population Characteristics |                       | n (%)         |                  |                |                |                  |                |                |                  |                |
| Alcohol Use                | Never                 | 43 (43.9)     | 22 (44.9)        | 21 (42.9)      | 68 (52.3)      | 36 (56.2)        | 32 (48.5)      | 54 (43.9)      | 28 (40.6)        | 26 (48.1)      |
|                            | Yes, before pregnancy | 49 (50.0)     | 24 (49.0)        | 25 (51.0)      | 56 (43.1)      | 27 (42.2)        | 29 (43.9)      | 52 (42.3)      | 31 (44.9)        | 21 (38.9)      |
| Currently Employed         | No                    | 25 (25.5)     | 8 (16.3)         | 17 (34.7)      | 38 (29.2)      | 16 (25.0)        | 22 (33.3)      | 33 (26.8)      | 17 (24.6)        | 16 (29.6)      |
|                            | Yes                   | 73 (74.5)     | 41 (83.7)        | 32 (65.3)      | 92 (70.8)      | 48 (75.0)        | 44 (66.7)      | 76 (61.8)      | 44 (63.8)        | 32 (59.3)      |
| Maternal Education         | GED or less           | 11 (11.2)     | 4 (8.2)          | 7 (14.3)       | 19 (14.6)      | 11 (17.2)        | 8 (12.1)       | 14 (11.4)      | 7 (10.1)         | 7 (13.0)       |
|                            | Some college          | 30 (30.6)     | 15 (30.6)        | 15 (30.6)      | 48 (36.9)      | 22 (34.4)        | 26 (39.4)      | 43 (35.0)      | 25 (36.2)        | 18 (33.3)      |
|                            | Bachelors or higher   | 56 (57.1)     | 29 (59.2)        | 27 (55.1)      | 62 (47.7)      | 30 (46.9)        | 32 (48.5)      | 51 (41.5)      | 29 (42.0)        | 22 (40.7)      |
| Annual Household Income    | <10k                  | 16 (16.3)     | 6 (12.2)         | 10 (20.4)      | 30 (23.1)      | 14 (21.9)        | 16 (24.2)      | 25 (20.3)      | 13 (18.8)        | 12 (22.2)      |
|                            | 10k - <30k            | 31 (31.6)     | 16 (32.7)        | 15 (30.6)      | 40 (30.8)      | 22 (34.4)        | 18 (27.3)      | 35 (28.5)      | 22 (31.9)        | 13 (24.1)      |
|                            | 30k - <50k            | 29 (29.6)     | 15 (30.6)        | 14 (28.6)      | 33 (25.4)      | 15 (23.4)        | 18 (27.3)      | 23 (18.7)      | 11 (15.9)        | 12 (22.2)      |
|                            | ≥50k                  | 14 (14.3)     | 9 (18.4)         | 5 (10.2)       | 14 (10.8)      | 9 (14.1)         | 5 (4.6)        | 13 (10.6)      | 9 (13.0)         | 4 (7.4)        |
| Maternal Age (years)       | 18-24                 | 21 (21.4)     | 12 (24.5)        | 9 (18.4)       | 36 (27.7)      | 15 (23.4)        | 21 (31.8)      | 31 (25.2)      | 17 (24.6)        | 14 (25.9)      |
|                            | 25-29                 | 33 (33.7)     | 14 (28.6)        | 19 (38.8)      | 44 (33.8)      | 24 (37.5)        | 20 (30.3)      | 39 (31.7)      | 24 (34.8)        | 15 (27.8)      |
|                            | 30-34                 | 25 (25.5)     | 13 (26.5)        | 12 (24.5)      | 29 (22.3)      | 13 (20.3)        | 16 (24.2)      | 23 (18.7)      | 11 (15.9)        | 12 (22.2)      |
|                            | 35-41                 | 19 (19.4)     | 10 (20.4)        | 9 (18.4)       | 21 (16.2)      | 12 (18.8)        | 9 (13.6)       | 16 (13.0)      | 9 (13.0)         | 7 (13.0)       |
| Marital Status             | Single                | 8 (8.2)       | 4 (8.2)          | 4 (8.2)        | 10 (7.7)       | 5 (7.8)          | 5 (7.6)        | 14 (11.4)      | 8 (11.6)         | 6 (11.1)       |
|                            | Married               | 64 (65.3)     | 32 (65.3)        | 32 (65.3)      | 72 (55.4)      | 33 (51.6)        | 39 (59.1)      | 66 (53.7)      | 35 (50.7)        | 31 (57.4)      |
|                            | Cohabiting            | 24 (24.5)     | 12 (24.5)        | 12 (24.5)      | 46 (35.4)      | 25 (39.1)        | 21 (31.8)      | 28 (22.8)      | 17 (24.6)        | 11 (20.4)      |
| BMI                        | ≤ 25                  | 45 (45.9)     | 17 (34.7)        | 28 (57.1)      | 65 (50.0)      | 30 (46.9)        | 35 (53.0)      | 53 (43.1)      | 28 (40.6)        | 25 (46.3)      |
|                            | > 25 to < 30          | 31 (31.6)     | 20 (40.8)        | 11 (22.4)      | 34 (26.2)      | 16 (25.0)        | 18 (27.3)      | 33 (26.8)      | 23 (33.3)        | 10 (18.5)      |
|                            | ≥ 30                  | 20 (20.4)     | 11 (22.4)        | 9 (18.4)       | 22 (16.9)      | 15 (23.4)        | 7 (10.6)       | 19 (15.4)      | 8 (11.6)         | 11 (20.4)      |
| Number of Children         | 0                     | 36 (36.7)     | 19 (38.8)        | 17 (34.7)      | 62 (47.7)      | 28 (43.7)        | 34 (51.5)      | 39 (31.7)      | 27 (39.1)        | 12 (22.2)      |
|                            | 1                     | 37 (37.8)     | 19 (38.8)        | 18 (36.7)      | 41 (31.5)      | 22 (34.4)        | 19 (28.8)      | 33 (26.8)      | 16 (23.2)        | 17 (31.5)      |
|                            | 2-5                   | 25 (25.5)     | 11 (22.4)        | 14 (28.6)      | 27 (20.8)      | 14 (21.9)        | 13 (19.7)      | 37 (30.1)      | 18 (26.1)        | 19 (35.2)      |

**Table S2.** Distributions of BDI scores among analysis group (n=274). Arithmetic means and standard deviation by age group.

| <b>Domain / Subdomain</b>     | <b>67 months (n=98)</b> | <b>12 months (n=130)</b> | <b>24 months (n=123)</b> |
|-------------------------------|-------------------------|--------------------------|--------------------------|
| <b>Adaptive Domain</b>        | 102.53 ± 14.98          | 102.12 ± 10.23           | 97.28 ± 11.71            |
| Self-Care                     | 10.51 ± 3               | 10.42 ± 2.05             | 8.48 ± 2.2               |
| <b>Personal-Social Domain</b> | 108.65 ± 7.17           | 105.61 ± 8.93            | 101.86 ± 12.31           |
| Adult Interaction             | 12.4 ± 2.15             | 11.38 ± 2                | 10.61 ± 3.35             |
| Self-Concept and Social Role  | 10.97 ± 1.29            | 10.77 ± 2.19             | 10.68 ± 2.49             |
| <b>Communication Domain</b>   | 97.04 ± 11.76           | 99.06 ± 11.66            | 90.34 ± 18.67            |
| Receptive Communication       | 8.78 ± 2.1              | 8.57 ± 2.56              | 7.86 ± 3.92              |
| Expressive Communication      | 10.13 ± 3.1             | 11.09 ± 2.67             | 8.37 ± 3.99              |
| <b>Motor Domain</b>           | 105.49 ± 9.77           | 103.65 ± 9.14            | 102.56 ± 8.21            |
| Fine Motor                    | 10.59 ± 2.39            | 11.28 ± 2.27             | 11.16 ± 2.07             |
| Gross Motor                   | 11.48 ± 2.3             | 10.09 ± 2.4              | 9.87 ± 1.78              |
| <b>Cognitive Domain</b>       | 100.06 ± 12.18          | 100.79 ± 8.95            | 86.41 ± 9.99             |
| Attention and Memory          | 9.61 ± 2.44             | 10.33 ± 2                | 7.42 ± 1.93              |
| Perception and Concepts       | 10.41 ± 1.94            | 9.92 ± 1.34              | 7.57 ± 2.12              |

**Table S3.** Comparison of uncorrected urinary phthalate and phthalate replacement metabolite concentrations (ng/ml) in study sample (N=274) by study visit. One-way ANOVA tests were used to test for differences in means between visits

| phthalate | visit | N   | n<LOD | %<LOD | GM    | GSD  | 25 <sup>th</sup> | 50 <sup>th</sup> | 75 <sup>th</sup> | p-value |
|-----------|-------|-----|-------|-------|-------|------|------------------|------------------|------------------|---------|
| MBP       | Total | 645 | 3     | 0     | 12.53 | 3.09 | 5.9              | 13.8             | 26.3             | 0.976   |
| MBP       | 1     | 228 | 0     | 0     | 13.04 | 2.91 | 5.8              | 13.35            | 26.22            |         |
| MBP       | 2     | 231 | 1     | 0     | 12.27 | 3.11 | 5.35             | 13.9             | 26.5             |         |
| MBP       | 3     | 186 | 2     | 1     | 12.24 | 3.29 | 7                | 14.65            | 26.2             |         |
| MBZP      | Total | 645 | 36    | 6     | 2.33  | 3.83 | 1                | 2.1              | 5.1              | 0.864   |
| MBZP      | 1     | 228 | 9     | 4     | 2.37  | 3.72 | 1                | 2.15             | 5.1              |         |
| MBZP      | 2     | 231 | 13    | 6     | 2.27  | 3.87 | 1                | 2.2              | 5                |         |
| MBZP      | 3     | 186 | 14    | 8     | 2.35  | 3.95 | 1                | 2                | 4.8              |         |
| MCNP      | Total | 645 | 13    | 2     | 1.34  | 2.51 | 0.8              | 1.3              | 2.2              | 0.655   |
| MCNP      | 1     | 228 | 1     | 0     | 1.46  | 2.39 | 0.9              | 1.4              | 2.3              |         |
| MCNP      | 2     | 231 | 8     | 3     | 1.22  | 2.57 | 0.7              | 1.2              | 2                |         |
| MCNP      | 3     | 186 | 4     | 2     | 1.35  | 2.57 | 0.8              | 1.35             | 2.28             |         |
| MCOP      | Total | 645 | 0     | 0     | 7.02  | 3.23 | 3.2              | 6                | 13.4             | 0.495   |
| MCOP      | 1     | 228 | 0     | 0     | 8.05  | 3.05 | 3.82             | 6.6              | 16.42            |         |
| MCOP      | 2     | 231 | 0     | 0     | 6.38  | 3.4  | 2.7              | 5.7              | 12               |         |
| MCOP      | 3     | 186 | 0     | 0     | 6.69  | 3.24 | 3.23             | 5.6              | 12.05            |         |
| MCP       | Total | 645 | 135   | 21    | 1.01  | 2.66 | 0.5              | 1                | 1.8              | 0.468   |
| MCP       | 1     | 228 | 39    | 17    | 1.09  | 2.66 | 0.6              | 1                | 1.83             |         |
| MCP       | 2     | 231 | 51    | 22    | 0.95  | 2.62 | 0.5              | 0.9              | 1.8              |         |
| MCP       | 3     | 186 | 45    | 24    | 0.99  | 2.71 | 0.43             | 1                | 1.9              |         |
| MECP      | Total | 645 | 1     | 0     | 10.48 | 2.5  | 6                | 10.5             | 18.2             | 0.564   |
| MECP      | 1     | 228 | 0     | 0     | 11.12 | 2.4  | 6.5              | 10.5             | 18.68            |         |
| MECP      | 2     | 231 | 1     | 0     | 10    | 2.48 | 6                | 10.1             | 17.65            |         |
| MECP      | 3     | 186 | 0     | 0     | 10.32 | 2.65 | 5.5              | 10.9             | 18.08            |         |
| MECPT     | Total | 497 | 0     | 0     | 28.76 | 3.98 | 11.3             | 22.1             | 57.6             | 0.571   |
| MECPT     | 1     | 174 | 0     | 0     | 29.05 | 4.23 | 10.2             | 21.95            | 56.42            |         |
| MECPT     | 2     | 176 | 0     | 0     | 28.49 | 3.89 | 12.3             | 22.9             | 55.88            |         |
| MECPT     | 3     | 147 | 0     | 0     | 28.75 | 3.84 | 11.55            | 22.5             | 59.15            |         |
| MEHHP     | Total | 645 | 5     | 1     | 5.72  | 2.79 | 3.2              | 5.9              | 10.5             | 0.97    |
| MEHHP     | 1     | 228 | 1     | 0     | 6.03  | 2.7  | 3.4              | 6.2              | 10.6             |         |
| MEHHP     | 2     | 231 | 2     | 1     | 5.52  | 2.79 | 3.1              | 5.8              | 10.3             |         |
| MEHHP     | 3     | 186 | 2     | 1     | 5.62  | 2.92 | 3.2              | 6.15             | 10.45            |         |
| MEHHT     | Total | 497 | 8     | 2     | 4.8   | 4.05 | 1.8              | 4.2              | 10.6             | 0.372   |
| MEHHT     | 1     | 174 | 2     | 1     | 5.17  | 4.14 | 1.72             | 4.25             | 10.35            |         |
| MEHHT     | 2     | 176 | 4     | 2     | 4.69  | 4.02 | 1.78             | 4.65             | 10.53            |         |
| MEHHT     | 3     | 147 | 2     | 1     | 4.53  | 4    | 1.8              | 3.7              | 10.9             |         |
| MEHP      | Total | 645 | 140   | 22    | 1.94  | 2.6  | 0.9              | 1.9              | 3.6              | 0.537   |
| MEHP      | 1     | 228 | 49    | 21    | 1.95  | 2.53 | 0.98             | 1.85             | 3.62             |         |
| MEHP      | 2     | 231 | 48    | 21    | 1.89  | 2.57 | 0.9              | 1.9              | 3.3              |         |
| MEHP      | 3     | 186 | 43    | 23    | 1.99  | 2.73 | 0.9              | 1.9              | 3.7              |         |

|       |       |     |     |    |       |      |      |       |       |       |
|-------|-------|-----|-----|----|-------|------|------|-------|-------|-------|
| MEOHP | Total | 645 | 1   | 0  | 5.17  | 2.79 | 3    | 5.6   | 9.7   | 0.84  |
| MEOHP | 1     | 228 | 0   | 0  | 5.23  | 2.69 | 2.9  | 5.55  | 8.93  |       |
| MEOHP | 2     | 231 | 1   | 0  | 5.02  | 2.8  | 2.95 | 5.2   | 9.95  |       |
| MEOHP | 3     | 186 | 0   | 0  | 5.28  | 2.9  | 3.12 | 5.9   | 9.78  |       |
| MEP   | Total | 645 | 1   | 0  | 31.14 | 4.83 | 9.7  | 23.7  | 79    | 0.881 |
| MEP   | 1     | 228 | 0   | 0  | 32.05 | 4.43 | 9.85 | 23.55 | 79.1  |       |
| MEP   | 2     | 231 | 0   | 0  | 30.13 | 4.84 | 9.05 | 23.7  | 77.7  |       |
| MEP   | 3     | 186 | 1   | 1  | 31.33 | 5.36 | 10.2 | 25.5  | 78.18 |       |
| MHBP  | Total | 640 | 107 | 17 | 1.32  | 2.93 | 0.6  | 1.3   | 2.8   | 0.952 |
| MHBP  | 1     | 227 | 31  | 14 | 1.38  | 2.88 | 0.6  | 1.4   | 2.95  |       |
| MHBP  | 2     | 228 | 40  | 18 | 1.26  | 2.94 | 0.5  | 1.3   | 2.62  |       |
| MHBP  | 3     | 185 | 36  | 19 | 1.34  | 2.99 | 0.6  | 1.4   | 2.8   |       |
| MHIBP | Total | 640 | 12  | 2  | 3.64  | 2.81 | 1.8  | 3.7   | 7.73  | 0.984 |
| MHIBP | 1     | 227 | 3   | 1  | 3.66  | 2.78 | 1.7  | 3.6   | 8.5   |       |
| MHIBP | 2     | 228 | 3   | 1  | 3.59  | 2.81 | 1.87 | 3.6   | 7.23  |       |
| MHIBP | 3     | 185 | 6   | 3  | 3.67  | 2.86 | 2    | 4     | 7.5   |       |
| MIBP  | Total | 645 | 11  | 2  | 8.46  | 2.89 | 4.1  | 9     | 18.3  | 0.746 |
| MIBP  | 1     | 228 | 1   | 0  | 8.34  | 2.85 | 4    | 8.9   | 19    |       |
| MIBP  | 2     | 231 | 4   | 2  | 8.45  | 2.94 | 4.05 | 8.5   | 18.2  |       |
| MIBP  | 3     | 186 | 6   | 3  | 8.61  | 2.9  | 4.3  | 9.8   | 16.8  |       |
| MONP  | Total | 497 | 32  | 6  | 2.04  | 3.35 | 1    | 1.8   | 4     | 0.924 |
| MONP  | 1     | 174 | 7   | 4  | 2.07  | 3.14 | 0.92 | 1.7   | 3.95  |       |
| MONP  | 2     | 176 | 12  | 7  | 1.9   | 3.37 | 0.8  | 1.7   | 4.2   |       |
| MONP  | 3     | 147 | 13  | 9  | 2.17  | 3.58 | 1.1  | 1.9   | 3.85  |       |

**Table S4.** a: Percent change in BDI-2 scores at 6 months per IQR increase in the geometric mean of maternal urinary phthalate metabolite concentrations (ng/ml) across pregnancy (n all = 98, n girls=49, n boys=49).

| Domain/Subdomain              | sex    | MBZP                 | MCOP                 | MONP                | MCNP                | MCP                 | MEP                  | DEHP                | DBP                | DIBP                 | DEHTP                 |
|-------------------------------|--------|----------------------|----------------------|---------------------|---------------------|---------------------|----------------------|---------------------|--------------------|----------------------|-----------------------|
| <b>Adaptive Domain</b>        | All    | 0.91 (-2.25,4.08)    | -1.01 (-4.45,2.43)   | 1.66 (-2.22,5.55)   | 0.52 (-2.94,3.98)   | -0.18 (-3.67,3.31)  | 0.17 (-3.68,4.01)    | 1.76 (-1.76,5.29)   | 3.36 (0.18,6.55)   | 4.8 (0.86,8.74)      | -0.98 (-4.64,2.69)    |
| <b>Adaptive Domain</b>        | Female | 0.93 (-3.22,5.08)    | -3.07 (-7.03,0.89)   | -1.77 (-6.88,3.34)  | -1.23 (-5.2,2.74)   | -1.96 (-6.19,2.26)  | 1.88 (-3.53,7.3)     | 1.15 (-3.07,5.36)   | 3.27 (-0.72,7.27)  | 8.83 (4.09,13.58)    | -0.85 (-5.08,3.37)    |
| <b>Adaptive Domain</b>        | Male   | -0.41 (-5.55,4.73)   | 0.89 (-5.41,7.18)    | 3.03 (-3.25,9.3)    | 2.74 (-3.67,9.16)   | 2.06 (-4.16,8.28)   | 0.53 (-5.45,6.52)    | -1.32 (-8.75,6.11)  | 3.47 (-1.76,8.7)   | -0.83 (-7.47,5.81)   | -7.53 (-14.58,-0.48)  |
| Self-Care                     | All    | 1.74 (-4.3,7.79)     | -1.93 (-8.49,4.63)   | 3.18 (-4.24,10.59)  | 1 (-5.61,7.6)       | -0.34 (-7.6,3.2)    | 0.31 (-7.03,7.67)    | 3.36 (-3.37,10.1)   | 6.41 (0.34,12.49)  | 9.16 (1.64,16.68)    | -1.87 (-8.86,5.12)    |
| Self-Care                     | Female | 1.77 (-6.14,9.69)    | -5.85 (-13.41,1.71)  | -3.38 (-13.13,6.38) | -2.35 (-9.92,5.22)  | -3.75 (-11.82,4.32) | 3.6 (-6.74,13.92)    | 2.19 (-5.85,10.24)  | 6.25 (-1.38,13.87) | 16.86 (7.81,25.93)   | -1.63 (-9.7,6.43)     |
| Self-Care                     | Male   | -0.78 (-10.6,9.02)   | 1.69 (-10.33,13.71)  | 5.77 (-6.21,17.76)  | 5.23 (-7.01,17.49)  | 3.94 (-7.94,15.81)  | 1.02 (-10.41,12.45)  | -2.52 (-16.7,11.67) | 6.63 (-3.37,16.62) | -1.59 (-14.26,11.09) | -14.37 (-27.83,-0.91) |
| <b>Personal-Social Domain</b> | All    | -0.61 (-2.09,0.88)   | -0.92 (-2.53,0.69)   | 0.82 (-0.42,2.07)   | -0.38 (-2.02,1.26)  | 0.13 (-1.52,1.77)   | -1.5 (-3.28,0.28)    | -0.47 (-2.14,1.2)   | 0.33 (-1.21,1.87)  | -0.23 (-2.14,1.69)   | -1.08 (-2.27,0.11)    |
| <b>Personal-Social Domain</b> | Female | -1.12 (-3.12,0.87)   | -1.5 (-3.42,0.43)    | 0.24 (-1.37,1.85)   | -1.42 (-3.33,0.49)  | -0.2 (-2.29,1.89)   | 0.85 (-1.79,3.49)    | -0.56 (-2.62,1.51)  | -0.01 (-2.05,2.02) | 0.52 (-2.15,3.19)    | -0.6 (-1.98,0.77)     |
| <b>Personal-Social Domain</b> | Male   | 0.52 (-1.83,2.86)    | 0.68 (-2.19,3.54)    | 1.65 (-0.5,3.8)     | 0.59 (-2.36,3.54)   | 1.46 (-1.36,4.28)   | -2.55 (-5.16,0.07)   | 0 (-3.4,3.39)       | 1.39 (-1.01,3.79)  | -0.05 (-3.08,2.98)   | -1.91 (-4.46,0.65)    |
| Adult Interaction             | All    | -1.21 (-4.98,2.56)   | -3.18 (-7.23,0.87)   | 0.93 (-2.44,4.32)   | -0.13 (-4.26,3.99)  | -0.17 (-4.33,3.99)  | -2.09 (-6.64,2.48)   | -0.82 (-5.04,3.4)   | 1.05 (-2.82,4.93)  | -1.2 (-6.04,3.64)    | -1.49 (-4.65,1.68)    |
| Adult Interaction             | Female | -3.05 (-7.67,1.57)   | -5.05 (-9.39,-0.71)  | -0.64 (-5.6,4.33)   | -4.06 (-8.4,0.27)   | -2.01 (-6.81,2.79)  | 5.19 (-0.77,11.15)   | -1.65 (-6.42,3.12)  | -1.88 (-6.52,2.76) | 0.58 (-5.64,6.79)    | -1.02 (-5.1,3.05)     |
| Adult Interaction             | Male   | 2.65 (-3.5,8.8)      | 1.82 (-5.76,9.4)     | 3.84 (-1.49,9.17)   | 4.9 (-2.77,12.56)   | 4.57 (-2.84,11.99)  | -5.56 (-12.58,1.46)  | 2.93 (-6.01,11.87)  | 6.3 (0.16,12.45)   | -0.1 (-8.11,7.92)    | -1.19 (-7.72,5.35)    |
| Self-Concept and Social Role  | All    | -1.07 (-3.73,1.58)   | 0.09 (-2.81,2.98)    | 2.22 (-0.58,5.03)   | -1.11 (-4.03,1.8)   | 0.57 (-2.36,3.51)   | -3.81 (-6.93,-0.69)  | -0.95 (-3.93,2.02)  | -0.19 (-2.94,2.56) | 0.56 (-2.86,3.97)    | -2.44 (-5.12,0.24)    |
| Self-Concept and Social Role  | Female | -0.87 (-5.09,3.36)   | 0.02 (-4.12,4.17)    | 1.63 (-1.62,4.89)   | -0.36 (-4.46,3.74)  | 1.31 (-3.02,5.66)   | -3.15 (-8.58,2.3)    | -0.48 (-4.81,3.83)  | 1.8 (-2.41,6)      | 1.69 (-3.87,7.24)    | -1.14 (-3.95,1.69)    |
| Self-Concept and Social Role  | Male   | -1.24 (-4.98,2.51)   | 0.52 (-4.09,5.13)    | 2.22 (-2.77,7.22)   | -3.26 (-7.89,1.37)  | 0.45 (-4.13,5.02)   | -3.73 (-7.96,0.5)    | -3.41 (-8.75,1.93)  | -2.02 (-5.88,1.84) | -0.26 (-5.13,4.6)    | -6.22 (-11.78,-0.65)  |
| <b>Communication Domain</b>   | All    | -3.42 (-6.2,-0.64)   | -2.67 (-5.73,0.4)    | -0.46 (-3.52,2.6)   | 0.12 (-3.01,3.26)   | -0.64 (-3.79,2.52)  | -3.71 (-7.1,-0.32)   | -0.39 (-3.6,2.82)   | -0.22 (-3.17,2.73) | -0.05 (-3.73,3.63)   | -2.45 (-5.27,0.37)    |
| <b>Communication Domain</b>   | Female | -3.58 (-7.07,-0.08)  | -2.38 (-5.9,1.14)    | -2.21 (-6.36,1.94)  | -1.8 (-5.28,1.67)   | 0.18 (-3.59,3.95)   | 0.98 (-3.82,5.77)    | 0.24 (-3.49,3.98)   | -0.32 (-3.96,3.32) | 2.62 (-2.15,7.4)     | -3.72 (-6.92,-0.52)   |
| <b>Communication Domain</b>   | Male   | -2.08 (-6.67,2.52)   | -1.48 (-7.15,4.18)   | 2.57 (-2.47,7.6)    | 1.94 (-3.87,7.75)   | 0.24 (-5.4,5.88)    | -5.84 (-10.93,-0.75) | 0.04 (-6.67,6.75)   | 1.39 (-3.41,6.19)  | -0.34 (-6.33,5.65)   | 0.45 (-5.64,6.53)     |
| Receptive Communication       | All    | -5.92 (-11.24,-0.62) | -7.15 (-12.88,-1.42) | -3.89 (-9.46,1.68)  | -0.42 (-6.37,5.55)  | -2.89 (-8.87,3.08)  | -7.23 (-13.67,-0.78) | -3.61 (-9.66,2.45)  | -3.88 (-9.43,1.67) | -3.53 (-10.5,3.42)   | -6.36 (-11.44,-1.28)  |
| Receptive Communication       | Female | -7.1 (-13.9,-0.3)    | -5.44 (-12.24,1.36)  | -3.66 (-12.16,4.83) | -4.65 (-11.36,2.05) | -0.48 (-7.84,6.86)  | -1.23 (-10.61,8.12)  | -0.3 (-7.58,6.98)   | -5.4 (-12.29,1.5)  | 1.36 (-8.07,10.79)   | -5.08 (-11.91,1.73)   |
| Receptive Communication       | Male   | -0.97 (-9.04,7.09)   | -5.32 (-15.08,4.43)  | -0.02 (-8.33,8.28)  | 3.19 (-6.92,13.31)  | -1.22 (-11.03,8.6)  | -7.92 (-17.1,1.15)   | -5.57 (-17.12,5.98) | 1.59 (-6.79,9.97)  | -2.43 (-12.84,7.98)  | -5.86 (-15.49,3.76)   |
| Expressive Communication      | All    | -6.91 (-14.06,0.26)  | -3.36 (-11.26,4.54)  | 1.67 (-6.8,10.15)   | 0.57 (-7.41,8.55)   | 0.26 (-7.78,8.3)    | -6.62 (-15.37,2.13)  | 1.8 (-6.36,9.96)    | 2.93 (-4.56,10.41) | 3.13 (-6.22,12.47)   | -3.1 (-11.04,4.86)    |
| Expressive Communication      | Female | -6.39 (-15.97,3.18)  | -4.07 (-13.57,5.44)  | -4.94 (-16.23,6.36) | -2.61 (-11.96,6.73) | 0.76 (-9.29,10.81)  | 4.76 (-7.96,17.49)   | 0.92 (-9.03,10.86)  | 3.9 (-5.73,13.52)  | 8.36 (-4.28,21)      | -8.64 (-17.51,0.24)   |

|                          |        |                     |                      |                     |                     |                     |                       |                     |                    |                     |                      |
|--------------------------|--------|---------------------|----------------------|---------------------|---------------------|---------------------|-----------------------|---------------------|--------------------|---------------------|----------------------|
| Expressive Communication | Male   | -6.57 (-18.54,5.39) | -0.49 (-15.37,14.39) | 9.2 (-5.2,23.6)     | 4.02 (-11.23,19.26) | 2.09 (-12.67,16.85) | -13.65 (-27.14,-0.15) | 5.46 (-12.03,22.95) | 3.82 (-8.75,16.38) | 1.06 (-14.63,16.75) | 6.55 (-10.84,23.95)  |
| <b>Motor Domain</b>      | All    | 0.01 (-2.05,2.08)   | -0.87 (-3.1,1.36)    | 0.59 (-1.84,3.02)   | -0.01 (-2.27,2.24)  | -0.01 (-2.3,2.27)   | -2.44 (-4.89,0.01)    | 0.18 (-2.13,2.49)   | 0.63 (-1.5,2.75)   | 0.88 (-1.84,3.59)   | -0.78 (-3.06,1.5)    |
| <b>Motor Domain</b>      | Female | 1.3 (-1.48,4.07)    | -2.08 (-4.75,0.6)    | -0.35 (-4.07,3.36)  | -1.82 (-4.45,0.81)  | -1.88 (-4.74,0.97)  | 0.12 (-3.55,3.8)      | -0.27 (-3.14,2.6)   | 0.7 (-2.09,3.49)   | 1.74 (-2.12,5.59)   | 0.18 (-2.87,3.24)    |
| <b>Motor Domain</b>      | Male   | -0.81 (-4.2,3.9)    | 1.82 (-2.07,5.7)     | 1.87 (-1.92,5.66)   | 1.92 (-2.07,5.92)   | 3.9 (0.19,7.61)     | -3.02 (-6.63,0.6)     | 0.93 (-3.7,5.56)    | 1.35 (-1.95,4.66)  | 0.82 (-3.32,4.95)   | -3.85 (-8.2,0.5)     |
| Fine Motor               | All    | 0.14 (-4.9,5.2)     | -2.97 (-8.42,2.48)   | 2.23 (-3.09,7.54)   | -2.98 (-8.46,2.5)   | -2.56 (-8.08,2.97)  | -5.35 (-11.37,0.67)   | -0.48 (-6.13,5.16)  | 3.18 (-1.97,8.33)  | 1.46 (-5.7,9.3)     | -1.44 (-6.45,3.57)   |
| Fine Motor               | Female | 4.18 (-3.67,12.03)  | -5.57 (-13.17,2.04)  | 3.49 (-5.74,12.72)  | -6.85 (-14.17,0.48) | -7.14 (-15.02,0.73) | 0.2 (-10.22,10.64)    | -0.42 (-8.52,7.68)  | 5.03 (-2.7,12.77)  | 4.18 (-6.25,14.6)   | -0.6 (-8.26,7.07)    |
| Fine Motor               | Male   | -1.99 (-8.74,4.76)  | 3.16 (-5.1,11.4)     | 2.78 (-4.43,9.97)   | 1.53 (-6.99,10.06)  | 6.03 (-2.14,0.7)    | -7 (-14.6,0.59)       | -0.34 (-10.15,9.47) | 3.02 (-3.97,10)    | 2.26 (-6.47,11)     | -5.43 (-13.83,2.98)  |
| Gross Motor              | All    | -0.26 (-4.57,4.03)  | -0.21 (-4.87,4.46)   | 0.1 (-5.24,5.44)    | 2.83 (-1.82,7.48)   | 2.82 (-1.89,7.53)   | -3.82 (-8.97,1.32)    | 1.34 (-3.46,6.14)   | -1.15 (-5.57,3.28) | 0.36 (-5.31,6.02)   | -1.53 (-6.54,3.48)   |
| Gross Motor              | Female | 0.56 (-5.5,6.63)    | -1.79 (-7.71,4.13)   | -4.12 (-12.53,4.29) | 0.02 (-5.79,5.84)   | 0.99 (-5.31,7.28)   | 0.39 (-7.55,8.33)     | 0.02 (-6.17,6.22)   | -2.69 (-8.69,3.29) | -0.24 (-8.64,8.17)  | 0.97 (-6.05,7.99)    |
| Gross Motor              | Male   | -0.9 (-7.42,5.62)   | 3.43 (-4.5,11.35)    | 3.98 (-4.07,12.04)  | 5.27 (-2.78,13.32)  | 8.08 (0.56,15.61)   | -4.3 (-11.77,3.2)     | 3.55 (-5.83,12.93)  | 1.95 (-4.8,8.71)   | 0.85 (-7.58,9.27)   | -8.54 (-17.75,0.66)  |
| <b>Cognitive Domain</b>  | All    | -0.93 (-3.81,1.95)  | -3.4 (-6.45,-0.34)   | -0.76 (-3.29,1.76)  | -0.55 (-3.7,2.6)    | -2.43 (-5.57,0.72)  | -1.38 (-4.87,2.1)     | -1.68 (-4.89,1.53)  | 0.75 (-2.24,3.74)  | -1.05 (-4.76,2.66)  | -2.79 (-5.06,-0.53)  |
| <b>Cognitive Domain</b>  | Female | 0.65 (-2.6,3.9)     | -2.7 (-5.78,0.39)    | 0.16 (-2.66,2.97)   | -2.25 (-5.3,0.79)   | -2.32 (-5.59,0.95)  | 0.72 (-3.54,4.99)     | -0.99 (-4.29,2.31)  | 1 (-2.22,4.22)     | 1.24 (-3.04,5.52)   | -1.93 (-4.14,0.28)   |
| <b>Cognitive Domain</b>  | Male   | -1.08 (-5.84,3.68)  | -3.13 (-8.87,2.61)   | -0.15 (-4.43,4.14)  | 0.43 (-5.56,6.42)   | -1.41 (-7.17,4.35)  | -0.73 (-6.22,4.76)    | -2.03 (-9.03,4.97)  | 1.94 (-3.1,6.98)   | -1.26 (-7.52,5)     | -6.05 (-10.88,-1.22) |
| Attention and Memory     | All    | -2.51 (-8.24,3.22)  | -6.23 (-12.34,-0.12) | 1.15 (-3.22,5.52)   | -2.63 (-8.89,3.65)  | -4.35 (-10.64,1.94) | -2.82 (-9.77,4.12)    | -3.65 (-10.05,2.76) | 0.44 (-5.54,6.41)  | -0.85 (-8.27,6.57)  | -4.52 (-8.46,-0.58)  |
| Attention and Memory     | Female | 0.26 (-6.74,7.25)   | -4.24 (-10.97,2.48)  | 1.99 (-3.34,7.32)   | -4.09 (-10.67,2.49) | -3.4 (-10.51,3.7)   | 3.88 (-5.2,12.96)     | -3.03 (-10.08,4.03) | 2.07 (-4.83,8.98)  | 5.69 (-3.37,14.74)  | -4.19 (-8.34,-0.02)  |
| Attention and Memory     | Male   | -3.37 (-12.15,5.4)  | -7.62 (-18.12,2.9)   | 1.18 (-6.15,8.52)   | -4.44 (-15.44,6.55) | -4.64 (-15.25,5.95) | -3.72 (-13.83,6.4)    | -4.74 (-17.66,8.18) | 0.47 (-8.93,9.87)  | -4.64 (-16.17,6.88) | -9.39 (-17.84,-0.94) |
| Perception and Concepts  | All    | -0.18 (-4.29,3.92)  | -3.69 (-8.08,0.7)    | -3.24 (-7.78,1.29)  | 0.92 (-3.56,5.4)    | -2.72 (-7.22,1.77)  | -1.13 (-6.1,3.84)     | -1.32 (-5.91,3.27)  | 1.58 (-2.67,5.83)  | -2.27 (-7.54,3)     | -3.55 (-7.77,0.66)   |
| Perception and Concepts  | Female | 1.65 (-3.29,6.6)    | -3.49 (-8.24,1.27)   | -1.36 (-6.57,3.85)  | -2.41 (-7.12,2.3)   | -3.13 (-8.15,1.88)  | -1.63 (-8.12,4.86)    | 0.09 (-4.97,5.15)   | 0.8 (-4.13,5.73)   | -2.02 (-8.56,4.51)  | -1.5 (-5.78,2.77)    |
| Perception and Concepts  | Male   | 0.19 (-6.9,7.28)    | -1.84 (-10.46,6.8)   | -1.71 (-9.4,5.98)   | 5.22 (-3.51,13.96)  | 0.09 (-8.49,8.67)   | 1.65 (-6.5,9.81)      | -1.48 (-11.89,8.95) | 4.81 (-2.58,12.19) | 0.69 (-8.62,10.01)  | -8 (-17.13,1.15)     |

**Table S4. b:** Percent change in BDI-2 scores at 12 months per IQR increase in the geometric mean of maternal urinary phthalate metabolite concentrations (ng/ml) across pregnancy (n all = 130, n girls=64, n boys=66).

| Domain/Subdomain              | sex    | MBZP                 | MCOP                 | MONP                | MCNP                 | MCP                  | MEP                  | DEHP                 | DBP                 | DIBP                | DEHP                |
|-------------------------------|--------|----------------------|----------------------|---------------------|----------------------|----------------------|----------------------|----------------------|---------------------|---------------------|---------------------|
| <b>Adaptive Domain</b>        | All    | 0.73 (-1.56,3.03)    | -1.98 (-4.49,0.53)   | -0.36 (-2.45,1.73)  | -0.04 (-2.19,2.11)   | -0.53 (-3.35,2.29)   | -2.63 (-4.75,-0.52)  | -1.45 (-3.91,1)      | -0.16 (-2.33,2.01)  | 0.11 (-2.57,2.78)   | -0.45 (-2.19,1.28)  |
| <b>Adaptive Domain</b>        | Female | -1.33 (-4.56,1.91)   | -1.77 (-5.54,2)      | 0.11 (-2.45,2.67)   | 0.87 (-1.97,3.72)    | -0.51 (-4.11,3.1)    | -2.56 (-5.53,0.41)   | -3.46 (-6.65,-0.28)  | -2.66 (-5.64,0.33)  | -2.21 (-6.07,1.65)  | 1.26 (-0.58,3.1)    |
| <b>Adaptive Domain</b>        | Male   | 2.23 (-1.03,5.48)    | -3.67 (-7.26,-0.09)  | -1.6 (-5.46,2.26)   | -2.34 (-5.71,1.02)   | -1.18 (-5.81,3.45)   | -3.11 (-6.18,-0.04)  | 0.44 (-3.33,4.21)    | 2.25 (-0.83,5.34)   | 1.73 (-2.03,5.49)   | -2.94 (-6.55,0.67)  |
| Self-Care                     | All    | 1.4 (-2.99,5.79)     | -3.78 (-8.57,1.01)   | -0.69 (-4.68,3.31)  | -0.07 (-4.18,4.03)   | -1.01 (-6.4,4.37)    | -5.03 (-9.07,-0.99)  | -2.78 (-7.46,1.92)   | -0.3 (-4.44,3.85)   | 0.21 (-4.9,5.31)    | -0.87 (-4.18,2.44)  |
| Self-Care                     | Female | -2.53 (-8.71,3.64)   | -3.37 (-10.57,3.82)  | 0.21 (-4.68,5.1)    | 1.67 (-3.76,7.1)     | -0.97 (-7.85,5.91)   | -4.89 (-10.55,0.78)  | -6.6 (-12.69,-0.53)  | -5.07 (-10.78,0.64) | -4.22 (-11.59,3.15) | 2.4 (-1.11,5.92)    |
| Self-Care                     | Male   | 4.25 (-1.97,10.47)   | -7.02 (-13.87,-0.16) | -3.06 (-10.42,4.32) | -4.48 (-10.9,1.95)   | -2.26 (-11.1,6.58)   | -5.95 (-11.8,-0.08)  | 0.83 (-6.37,8.04)    | 4.31 (-1.59,10.19)  | 3.31 (-3.88,10.48)  | -5.61 (-12.5,1.28)  |
| <b>Personal-Social Domain</b> | All    | -1.16 (-2.99,0.68)   | -3.28 (-5.25,-1.3)   | -1.21 (-3.06,0.65)  | -2.09 (-3.76,-0.43)  | -1.09 (-3.33,1.14)   | -0.61 (-2.37,1.16)   | -1.11 (-3.11,0.88)   | -0.63 (-2.37,1.11)  | -0.33 (-2.45,1.79)  | 0.01 (-1.53,1.56)   |
| <b>Personal-Social Domain</b> | Female | -1.58 (-4.53,1.36)   | -4.03 (-7.31,-0.75)  | -2.17 (-5.23,0.89)  | -2.03 (-4.56,0.5)    | -1.41 (-4.66,1.85)   | -1.95 (-4.66,0.77)   | -3.66 (-6.64,-0.68)  | -2.52 (-5.3,0.26)   | -1.23 (-4.77,2.3)   | -0.56 (-2.82,1.7)   |
| <b>Personal-Social Domain</b> | Male   | -0.83 (-3.23,1.57)   | -3.45 (-6.13,-0.77)  | -0.49 (-3.13,2.15)  | -2.35 (-4.76,0.05)   | -0.53 (-3.89,2.82)   | 0.71 (-1.71,3.12)    | 1.52 (-1.19,4.22)    | 0.97 (-1.27,3.22)   | 0.4 (-2.32,3.13)    | 0.63 (-1.89,3.15)   |
| Adult Interaction             | All    | -2.69 (-6.74,1.37)   | -7.23 (-11.62,-2.83) | -3.53 (-7.66,0.62)  | -4.64 (-8.35,-0.94)  | -4.11 (-9.04,0.81)   | -0.12 (-4.05,3.82)   | -2.47 (-6.82,1.88)   | -1.01 (-4.82,2.8)   | -0.74 (-5.44,3.95)  | -1.72 (-5.19,1.73)  |
| Adult Interaction             | Female | -4.76 (-11.1,4.8)    | -7.31 (-14.48,-0.13) | -4.8 (-11.53,1.94)  | -3.82 (-9.31,1.68)   | -5.92 (-12.8,0.97)   | -1.2 (-7.16,4.78)    | -6.4 (-12.67,-0.13)  | -3.85 (-9.78,2.09)  | -3.46 (-11.06,4.13) | -1.65 (-6.65,3.36)  |
| Adult Interaction             | Male   | -0.57 (-6.12,4.98)   | -7.97 (-14.15,-1.8)  | -2.26 (-8.22,3.7)   | -5.66 (-11.18,-0.14) | -0.84 (-8.58,6.9)    | 0.51 (-5.07,6.09)    | 2.55 (-3.71,8.81)    | 1.57 (-3.57,6.72)   | 1.67 (-4.53,7.88)   | -3.47 (-9.1,2.16)   |
| Self-Concept and Social Role  | All    | -1.83 (-6.58,2.93)   | -5.88 (-11.02,-0.75) | -1.24 (-6.17,3.69)  | -3.91 (-8.29,0.48)   | -0.17 (-6.01,5.66)   | -2.51 (-6.97,1.95)   | -2.15 (-7.34,3.05)   | -1.57 (-6.11,2.96)  | -0.48 (-6.5,0.6)    | 1.86 (-2.19,5.91)   |
| Self-Concept and Social Role  | Female | -1.45 (-9.09,6.19)   | -9.3 (-17.83,-0.78)  | -3.88 (-11.61,3.86) | -4.68 (-11.22,1.86)  | 0.37 (-8.07,8.8)     | -7.07 (-13.93,-0.23) | -8.29 (-16.04,-0.54) | -6.28 (-13.44,0.88) | -1.27 (-10.4,7.85)  | -0.59 (-6.25,5.08)  |
| Self-Concept and Social Role  | Male   | -2.79 (-8.98,3.39)   | -5.08 (-11.95,1.79)  | 0.4 (-7.05,7.86)    | -3.7 (-10.07,2.67)   | -1.26 (-10.7,4.7)    | 2.33 (-3.63,8.28)    | 3.51 (-3.54,10.55)   | 2.36 (-3.52,8.25)   | -0.03 (-7.17,7.11)  | 6.32 (-0.55,13.2)   |
| <b>Communication Domain</b>   | All    | 0.83 (-1.79,3.45)    | 0.83 (-2.05,3.72)    | 1.21 (-1.41,3.84)   | 1.61 (-0.82,4.04)    | 0.85 (-2.36,4.06)    | -0.81 (-3.28,1.65)   | 2.34 (-0.45,5.12)    | 0.44 (-2.03,2.92)   | 0.35 (-2.7,3.4)     | -0.13 (-2.31,2.06)  |
| <b>Communication Domain</b>   | Female | -0.01 (-3.87,3.85)   | 1.53 (-2.96,6.02)    | 1.18 (-2.92,5.28)   | 1.68 (-1.68,5.03)    | 1.19 (-3.08,5.46)    | -0.34 (-3.96,3.28)   | 1 (-2.93,4.93)       | -0.36 (-4.3,2.9)    | -1.84 (-6.45,2.76)  | 1.25 (-1.74,4.23)   |
| <b>Communication Domain</b>   | Male   | 1.87 (-1.81,5.55)    | 0.17 (-4.4,3.5)      | 2.11 (-1.89,6.11)   | 1.69 (-2.12,5.51)    | 0.73 (-4.48,5.94)    | -1.81 (-5.34,1.73)   | 4.71 (0.66,8.76)     | 1.15 (-2.36,4.67)   | 1.99 (-2.23,6.21)   | -2.66 (-6.44,1.12)  |
| Receptive Communication       | All    | 1.58 (-5.59,8.74)    | -4.17 (-12.03,3.68)  | 0.12 (-7.06,7.31)   | 2.38 (-4.3,9.05)     | -1.2 (-9.99,7.57)    | -1.28 (-8.03,5.48)   | 1.76 (-5.92,9.44)    | 3.15 (-3.59,9.89)   | 5.49 (-2.79,13.75)  | -0.5 (-6.46,5.46)   |
| Receptive Communication       | Female | -0.13 (-10.58,10.31) | 3.54 (-8.62,15.7)    | 4.13 (-6.65,14.93)  | 5.16 (-3.9,14.21)    | -0.14 (-11.72,11.44) | -3.48 (-13.22,6.27)  | -2.7 (-13.34,7.94)   | -2.97 (-12.8,6.87)  | 0.39 (-12.15,12.92) | 2.75 (-5.15,10.66)  |
| Receptive Communication       | Male   | 4.37 (-5.56,14.3)    | -8.62 (-19.61,2.38)  | -1.73 (-12.67,9.2)  | 1.11 (-9.21,11.44)   | 0.8 (-13.22,14.81)   | -0.76 (-10.35,8.84)  | 9.77 (-1.33,20.88)   | 9.18 (0.18,36)      | 10.82 (-0.26,21.9)  | -8.52 (-18.68,1.63) |
| Expressive Communication      | All    | 1.71 (-3.9,7.31)     | 5.82 (-0.27,11.92)   | 4.01 (-1.63,9.65)   | 3.75 (-1.46,8.95)    | 3.76 (-3.1,10.61)    | -1.88 (-7.17,3.41)   | 6.55 (0.63,12.46)    | -0.79 (-6.08,4.51)  | -2.88 (-9.38,3.62)  | -0.11 (-4.83,4.61)  |
| Expressive Communication      | Female | 0.12 (-8.14,8.38)    | 2.53 (-7.09,12.15)   | 1 (-7.88,9.89)      | 1.91 (-5.32,9.14)    | 4.15 (-4.94,13.23)   | 1.11 (-6.63,8.85)    | 5.22 (-3.09,13.53)   | 0.9 (-6.9,8.71)     | -6.59 (-16.35,3.16) | 2.27 (-4.21,8.74)   |
| Expressive Communication      | Male   | 3.14 (-4.84,11.13)   | 6.87 (-1.98,15.71)   | 8.4 (-0.09,16.89)   | 4.94 (-3.26,13.15)   | 1.84 (-9.42,13.1)    | -5.41 (-12.99,2.17)  | 8.69 (-0.18,17.57)   | -2.68 (-10.27,4.91) | -1.16 (-10.35,8.01) | -2.89 (-11.27,5.49) |



|                         |        |                      |                      |                     |                     |                     |                     |                     |                      |                     |                     |
|-------------------------|--------|----------------------|----------------------|---------------------|---------------------|---------------------|---------------------|---------------------|----------------------|---------------------|---------------------|
| <b>Motor Domain</b>     | All    | -0.66 (-2.67,1.36)   | -1.82 (-4.02,0.37)   | -0.9 (-2.87,1.07)   | -1.16 (-3.04,0.71)  | -1.02 (-3.48,1.44)  | -0.56 (-2.46,1.34)  | -0.88 (-3.04,1.28)  | -0.53 (-2.43,1.37)   | 0.28 (-2.06,2.63)   | 1.58 (-0.03,3.19)   |
| <b>Motor Domain</b>     | Female | 0.5 (-2.47,3.47)     | 0.59 (-2.87,4.06)    | 0.35 (-2.71,3.41)   | 0.15 (-2.45,2.76)   | -0.21 (-3.51,3.08)  | -0.67 (-3.45,2.11)  | -0.82 (-3.85,2.2)   | -0.43 (-3.24,2.37)   | 2.59 (-0.91,6.09)   | 1.27 (-0.94,3.49)   |
| <b>Motor Domain</b>     | Male   | -1.71 (-4.5,1.09)    | -3.99 (-7,-0.99)     | -1.94 (-4.86,0.99)  | -2.72 (-5.56,0.12)  | -1.58 (-5.54,2.37)  | -0.55 (-3.27,2.17)  | -0.61 (-3.84,2.62)  | -0.47 (-3.15,2.22)   | -1.3 (-4.51,1.92)   | 1.98 (-0.8,4.76)    |
| Fine Motor              | All    | 2.09 (-2.22,6.4)     | -3.66 (-8.37,1.05)   | 0.16 (-3.58,3.89)   | -2.79 (-6.8,1.21)   | 1.04 (-4.26,6.34)   | 0.15 (-3.93,4.23)   | 0.27 (-4.38,4.91)   | 2.8 (-1.25,6.85)     | 0.32 (-4.72,5.34)   | 2.45 (-0.61,5.52)   |
| Fine Motor              | Female | 3.42 (-2.72,9.54)    | 0.78 (-6.45,8.03)    | 3.86 (-2.26,9.98)   | -0.88 (-6.32,4.55)  | 1.6 (-5.26,8.45)    | -0.05 (-5.86,5.77)  | -1.87 (-8.17,4.44)  | 1.98 (-3.85,7.81)    | 1.95 (-5.47,9.37)   | 3.43 (-1.7,8.8)     |
| Fine Motor              | Male   | 0.94 (-5.37,7.25)    | -7.52 (-14.33,-0.71) | -0.95 (-5.84,3.93)  | -4.66 (-11.07,1.75) | 1.49 (-7.35,10.34)  | 0.55 (-5.5,6.61)    | 3.21 (-3.95,10.36)  | 3.72 (-2.19,9.63)    | -0.6 (-7.82,6.61)   | 0.6 (-4.07,5.26)    |
| Gross Motor             | All    | -6.05 (-12.2,0.1)    | -3.53 (-10.37,3.31)  | -4.4 (-11.12,2.31)  | -1.79 (-7.61,4.03)  | -6.01 (-13.57,1.56) | -2.87 (-8.73,2.99)  | -4.53 (-11.18,2.12) | -6.32 (-12.09,-0.56) | 0.8 (-6.45,8.06)    | 4.03 (-1.53,9.58)   |
| Gross Motor             | Female | -2.56 (-11.88,6.76)  | 1.26 (-9.64,12.17)   | -3.77 (-13.64,6.08) | 1.66 (-6.53,9.84)   | -2.96 (-13.28,7.37) | -3.11 (-11.82,5.62) | -1.56 (-11.09,7.97) | -4.73 (-13.46,4)     | 9.01 (-1.94,19.96)  | 1.18 (-6.07,8.43)   |
| Gross Motor             | Male   | -9.25 (-17.67,-0.81) | -8.03 (-17.65,1.61)  | -7.49 (-18.43,3.45) | -6.39 (-15.3,2.53)  | -9.35 (-21.42,2.7)  | -3.39 (-11.77,4.99) | -7.05 (-16.88,2.8)  | -7.33 (-15.42,0.77)  | -5.11 (-15.04,4.83) | 8.64 (-1.7,18.99)   |
| <b>Cognitive Domain</b> | All    | 0.52 (-1.36,2.4)     | -2.61 (-4.63,-0.6)   | -1.05 (-2.91,0.81)  | -0.96 (-2.71,0.79)  | -1 (-3.3,1.29)      | -1.2 (-2.96,0.56)   | -1 (-3.01,1.01)     | 0.53 (-1.23,2.3)     | 0.02 (-2.16,2.2)    | -0.78 (-2.33,0.77)  |
| <b>Cognitive Domain</b> | Female | 1.5 (-1.08,4.08)     | -2.28 (-5.27,0.71)   | -0.2 (-2.65,2.26)   | -1.22 (-3.49,1.04)  | -0.39 (-3.28,2.51)  | -0.64 (-3.08,1.8)   | -0.97 (-3.62,1.69)  | -0.65 (-3.11,1.81)   | 0.08 (-3.05,3.22)   | -0.09 (-1.89,1.7)   |
| <b>Cognitive Domain</b> | Male   | -0.03 (-2.75,2.69)   | -3.04 (-5.99,-0.09)  | -1.62 (-4.71,1.48)  | -0.67 (-3.47,2.14)  | -1.26 (-5.06,2.54)  | -2.34 (-4.88,0.2)   | -0.3 (-3.4,2.81)    | 1.81 (-0.71,4.33)    | 0.16 (-2.93,3.26)   | -2.1 (-5.02,0.82)   |
| Attention and Memory    | All    | 1.94 (-2.11,6.01)    | -8.23 (-12.45,-4)    | -1.81 (-5.92,2.3)   | -4.44 (-8.16,-0.72) | -0.87 (-5.87,4.13)  | -2.57 (-6.37,1.25)  | -2.79 (-7.13,1.55)  | 2.67 (-1.13,6.46)    | 0.72 (-3.99,5.44)   | -1.68 (-5.09,1.72)  |
| Attention and Memory    | Female | 2.96 (-2.63,8.56)    | -8.91 (-15.05,-2.77) | 0.32 (-5.1,5.74)    | -6 (-10.69,-1.32)   | -1.49 (-7.74,4.76)  | -1.83 (-7.1,3.45)   | -4.4 (-10.04,1.24)  | -0.59 (-5.92,4.75)   | -0.49 (-7.26,6.29)  | -0.39 (-4.35,3.58)  |
| Attention and Memory    | Male   | 1.72 (-4.34,7.79)    | -7.61 (-14.14,-1.08) | -2.09 (-9.23,5.05)  | -2.15 (-8.41,4.11)  | 1.38 (-7.14,9.91)   | -4.02 (-9.77,1.73)  | 0.03 (-6.92,6.96)   | 5.89 (0.37,11.41)    | 2.25 (-4.64,9.14)   | -3.51 (-10.27,3.25) |
| Perception and Concepts | All    | -0.63 (-3.55,2.29)   | 0.88 (-2.33,4.1)     | -1.38 (-4.45,1.69)  | 1.81 (-0.89,4.53)   | -2.27 (-5.84,1.28)  | -0.66 (-3.43,2.09)  | -0.1 (-3.24,3.03)   | -1.21 (-3.95,1.54)   | -0.58 (-3.98,2.82)  | -0.69 (-3.25,1.86)  |
| Perception and Concepts | Female | 1.36 (-2.89,5.61)    | 2.63 (-2.3,7.55)     | -0.99 (-5.27,3.27)  | 2.72 (-0.94,6.39)   | 0.17 (-4.56,4.9)    | 0.23 (-3.76,4.23)   | 1.74 (-2.59,6.07)   | -1.28 (-5.3,2.73)    | 0.95 (-4.16,6.06)   | -0.01 (-3.13,3.12)  |
| Perception and Concepts | Male   | -2.13 (-6.01,1.74)   | -1.05 (-5.44,3.34)   | -2.91 (-7.69,1.88)  | 0.22 (-3.82,4.27)   | -5.31 (-10.61,0)    | -2.61 (-6.3,1.07)   | -0.97 (-5.43,3.49)  | -0.8 (-4.51,2.91)    | -1.78 (-6.23,2.69)  | -2.77 (-7.32,1.8)   |

**Table S4.** c: Percent change in BDI-2 scores at 24 months per IQR increase in the geometric mean of maternal urinary phthalate metabolite concentrations (ng/ml) across pregnancy (n all = 123, n girls=69, n boys=54).

| Domain/Subdomain              | sex    | MBZP                  | MCOP                   | MONP                   | MCNP                 | MCPP                   | MEP                  | DEHP                  | DBP                   | DIBP                | DEHTP                 |
|-------------------------------|--------|-----------------------|------------------------|------------------------|----------------------|------------------------|----------------------|-----------------------|-----------------------|---------------------|-----------------------|
| <b>Adaptive Domain</b>        | All    | -2.01 (-5.05,1.03)    | -2.81 (-5.43,-0.19)    | -4.04 (-7.62,-0.45)    | -3.36 (-6.25,-0.46)  | -4.95 (-7.7,-2.2)      | 1.28 (-2.04,4.6)     | -1.61 (-4.01,0.79)    | -4.77 (-7.77,-1.77)   | -0.25 (-3.61,3.1)   | -1.71 (-4.86,1.44)    |
| <b>Adaptive Domain</b>        | Female | -4.3 (-7.92,-0.68)    | -2.11 (-5.01,0.78)     | -2.01 (-6.88,2.87)     | -2.03 (-5.12,1.06)   | -3.8 (-6.87,-0.72)     | 1.29 (-2.34,4.92)    | -1.87 (-4.8,1.07)     | -3.16 (-7.35,1.04)    | 0.38 (-3.56,4.32)   | -2.24 (-6.06,1.58)    |
| <b>Adaptive Domain</b>        | Male   | 0.34 (-5.48,6.16)     | -5.55 (-11.16,0.06)    | -5.94 (-11.63,-0.25)   | -9.09 (-15.92,-2.26) | -9.84 (-15.74,-3.94)   | 1.08 (-6.22,8.39)    | -1.57 (-6.8,3.65)     | -6.95 (-11.79,-2.12)  | -1.77 (-8.51,4.96)  | -1.88 (-8.1,4.34)     |
| Self-Care                     | All    | -1.76 (-9.07,5.57)    | 1.32 (-5.11,7.77)      | -3.46 (-11.22,4.28)    | 0.83 (-6.19,7.83)    | -4.73 (-11.73,2.27)    | 1.26 (-6.78,9.3)     | -2.23 (-8.05,3.59)    | -7.05 (-14.55,0.47)   | 2.12 (-6.01,10.24)  | -1.12 (-7.81,5.59)    |
| Self-Care                     | Female | -7.65 (-17.38,2.08)   | 4.39 (-3.23,12)        | 3.18 (-7.11,13.47)     | 2.77 (-5.39,10.95)   | -2.8 (-11.26,5.66)     | -0.31 (-9.84,9.21)   | -4.91 (-12.57,2.75)   | -4.02 (-15.17,7.12)   | 2.52 (-7.75,12.8)   | 0.54 (-7.66,8.73)     |
| Self-Care                     | Male   | 3.14 (-8.91,15.19)    | -8.36 (-20.68,3.95)    | -9.45 (-21.35,2.45)    | -7.88 (-22.24,6.47)  | -15.07 (-28.68,-1.46)  | 4.47 (-11.1,20.04)   | 1.81 (-9.29,12.91)    | -10.68 (-21.73,0.37)  | 0.74 (-13.82,15.28) | -4.6 (-17.33,8.12)    |
| <b>Personal-Social Domain</b> | All    | -0.23 (-3.37,2.91)    | -3.15 (-5.81,-0.48)    | -5.09 (-8.95,-1.24)    | -1.45 (-4.39,1.49)   | -5.42 (-8.15,-2.69)    | 1.31 (-2.13,4.75)    | -1.36 (-3.83,1.11)    | -2.16 (-5.35,1.03)    | 0.58 (-2.91,4.07)   | -0.02 (-3.38,3.34)    |
| <b>Personal-Social Domain</b> | Female | -2.14 (-5.59,1.3)     | -0.76 (-3.38,1.85)     | -2.29 (-6.94,2.35)     | 0.12 (-2.62,2.85)    | -3.6 (-6.27,-0.94)     | 0.1 (-3.21,3.42)     | -1.48 (-4.09,1.13)    | -1.09 (-4.85,2.67)    | -0.48 (-3.98,3.02)  | 0.33 (-3.08,3.75)     |
| <b>Personal-Social Domain</b> | Male   | 2.09 (-3.97,8.15)     | -8.39 (-14.19,-2.59)   | -7.6 (-13.56,-1.63)    | -5.43 (-12.54,1.68)  | -9.84 (-16.38,-3.3)    | 2.52 (-5.29,10.32)   | 0.15 (-5.62,5.92)     | -3.76 (-9.54,2.02)    | 1.42 (-6.18,9.03)   | -1.97 (-8.73,4.8)     |
| Adult Interaction             | All    | -1.69 (-9.75,6.38)    | -8.31 (-15.21,-1.41)   | -11.77 (-21.54,-1.99)  | -4.36 (-12.03,3.31)  | -14.06 (-21.29,-6.84)  | 1.83 (-7.07,10.73)   | -4.06 (-10.43,2.3)    | -5.23 (-13.56,3.11)   | -3.05 (-11.96,5.87) | 1.92 (-6.51,10.35)    |
| Adult Interaction             | Female | -4.75 (-15.11,5.62)   | -4.63 (-12.61,3.35)    | -6.27 (-19.37,6.84)    | -1.81 (-10.33,6.72)  | -10.79 (-19.16,-2.42)  | -1.11 (-11.16,8.91)  | -4.14 (-12.16,3.89)   | -6.13 (-17.65,5.39)   | -9.46 (-19.86,0.93) | 2.37 (-7.22,11.96)    |
| Adult Interaction             | Male   | 3.01 (-11.2,17.22)    | -17.44 (-31.11,-3.77)  | -17.18 (-31.5,-2.86)   | -11.63 (-28.37,5.12) | -22.49 (-37.82,-7.15)  | 4.69 (-13.69,23.05)  | -1.65 (-14.74,11.44)  | -6.6 (-20.09,6.9)     | 3.83 (-13.22,20.88) | -1.52 (-17.72,14.67)  |
| Self-Concept and Social Role  | All    | -4.09 (-10.21,2.04)   | -6.41 (-11.6,-1.22)    | -11.8 (-18.84,-4.76)   | -2.87 (-8.69,2.94)   | -10.15 (-15.62,-4.67)  | -1.21 (-7.97,5.57)   | -4.31 (-9.1,0.48)     | -7.38 (-13.54,-1.22)  | -1.19 (-7.97,5.6)   | 0.52 (-6.02,7.05)     |
| Self-Concept and Social Role  | Female | -11.75 (-19.15,-4.34) | -3.01 (-8.97,2.95)     | -9.59 (-19.48,0.3)     | -1.09 (-7.47,5.27)   | -7.07 (-13.41,-0.73)   | -2.69 (-10.3,4.92)   | -6.82 (-12.69,-0.95)  | -7.32 (-15.86,1.23)   | -0.06 (-8.22,8.1)   | -1.05 (-9.33,7.23)    |
| Self-Concept and Social Role  | Male   | 3.86 (-7.01,14.71)    | -13.6 (-24.06,-3.13)   | -14.54 (-25.15,-3.92)  | -7.79 (-20.79,5.22)  | -17.04 (-28.84,-5.25)  | -1.4 (-15.57,12.76)  | 1.26 (-8.79,11.32)    | -8.94 (-19.09,1.21)   | -4.54 (-17.72,8.65) | 0.05 (-12.22,12.32)   |
| <b>Communication Domain</b>   | All    | -1.71 (-7,3.58)       | -7.67 (-12.06,-3.29)   | -9.86 (-15.71,-4)      | -3.84 (-8.85,1.17)   | -10.67 (-15.28,-6.06)  | 1.05 (-4.76,6.86)    | -4.16 (-8.3,-0.03)    | -5.74 (-11.15,-0.33)  | -0.44 (-6.32,5.45)  | -4.41 (-9.73,0.92)    |
| <b>Communication Domain</b>   | Female | -3.61 (-10.43,3.2)    | -4.79 (-9.96,0.38)     | -5.02 (-13.8,3.76)     | -1.89 (-7.54,3.76)   | -8.34 (-13.74,-2.94)   | -0.66 (-7.25,5.93)   | -5.59 (-10.75,-0.43)  | -6.41 (-13.96,1.13)   | 0.32 (-6.81,7.44)   | -4.21 (-11.15,2.73)   |
| <b>Communication Domain</b>   | Male   | 1.32 (-8.12,10.77)    | -13.27 (-22.07,-4.47)  | -13.96 (-22.34,-5.57)  | -8.16 (-19.23,2.92)  | -15.82 (-25.84,-5.8)   | 3.22 (-8.97,15.41)   | -0.48 (-9.17,8.21)    | -5.09 (-14.02,3.84)   | -1.16 (-12.52,10.2) | -6.01 (-15.94,3.92)   |
| Receptive Communication       | All    | -6.72 (-18.23,4.77)   | -17.81 (-27.31,-8.31)  | -18.78 (-31.79,-5.77)  | -7.05 (-18.05,3.93)  | -21.28 (-31.55,-11.01) | 3.15 (-9.53,15.84)   | -11.55 (-20.47,-2.63) | -14.36 (-26.08,-2.64) | -3.19 (-16.02,9.64) | -11.63 (-23.14,-0.12) |
| Receptive Communication       | Female | -9.9 (-24.45,4.65)    | -8.43 (-19.67,2.8)     | -0.02 (-18.31,18.27)   | -1.14 (-13.33,11.06) | -14.42 (-26.41,-2.43)  | -1.49 (-15.67,12.67) | -12.89 (-23.9,-1.88)  | -15.13 (-31.25,0.99)  | 1.56 (-13.76,16.88) | -5.38 (-19.75,8.99)   |
| Receptive Communication       | Male   | -3.84 (-24.79,17.09)  | -39.02 (-56.52,-21.53) | -33.55 (-52.15,-14.94) | -23.19 (-47.26,0.89) | -41.4 (-62.35,-20.44)  | 11.88 (-14.96,38.73) | -10.1 (-29.08,8.89)   | -13.17 (-32.86,6.52)  | -9.1 (-34.16,15.94) | -20.94 (-42.71,0.85)  |
| Expressive Communication      | All    | -0.38 (-14.08,13.31)  | -15.41 (-27.03,-3.8)   | -24.4 (-39.67,-9.13)   | -9.27 (-22.24,3.7)   | -24.37 (-36.57,-12.15) | 0.23 (-14.78,15.26)  | -6.04 (-16.88,4.79)   | -10.97 (-25.11,3.17)  | 0.54 (-14.67,15.75) | -6.51 (-20.49,7.46)   |

|                          |        |                      |                        |                       |                       |                       |                      |                      |                       |                      |                      |
|--------------------------|--------|----------------------|------------------------|-----------------------|-----------------------|-----------------------|----------------------|----------------------|-----------------------|----------------------|----------------------|
| Expressive Communication | Female | -5.32 (-23.08,12.46) | -12.26 (-25.65,1.13)   | -22.52 (-45.05,0)     | -6.96 (-21.52,7.61)   | -21.01 (-35.06,-6.95) | -1.85 (-18.91,15.22) | -11.16 (-24.76,2.43) | -12.32 (-32.09,7.44)  | -1.37 (-19.8,17.07)  | -12.43 (-30.84,5.97) |
| Expressive Communication | Male   | 9.57 (-14.18,33.34)  | -18.49 (-42.74,5.76)   | -27.17 (-49.44,-4.9)  | -11.23 (-39.92,17.46) | -26.87 (-54.2,0.46)   | -0.5 (-31.53,30.52)  | 8.49 (-13.37,30.34)  | -10.12 (-32.91,12.67) | 3.84 (-24.93,32.61)  | -3.67 (-28.89,21.56) |
| <b>Motor Domain</b>      | All    | 0.23 (-1.71,2.17)    | -2.03 (-3.73,-0.33)    | -3.03 (-5.43,-0.63)   | -1.21 (-3.15,0.73)    | -2.45 (-4.35,-0.55)   | -0.61 (-2.75,1.53)   | -0.13 (-1.72,1.46)   | -1.92 (-3.91,0.06)    | -0.2 (-2.31,1.92)    | -2.05 (-4.44,0.34)   |
| <b>Motor Domain</b>      | Female | -1 (-3.44,1.45)      | -1.6 (-3.51,0.31)      | -1.9 (-5.36,1.57)     | -1.32 (-3.46,0.83)    | -2.73 (-4.79,-0.67)   | -0.75 (-3.12,1.63)   | -1.04 (-2.94,0.86)   | -2.18 (-4.86,0.51)    | -1.15 (-3.66,1.37)   | 0.61 (-2.72,3.94)    |
| <b>Motor Domain</b>      | Male   | 1 (-2.44,4.44)       | -4.46 (-7.8,-1.12)     | -3.85 (-7.3,-0.4)     | -2.36 (-6.63,1.92)    | -4.01 (-8.11,0.08)    | -0.39 (-4.92,4.13)   | 0.56 (-2.64,3.76)    | -2.79 (-6.04,0.45)    | 0.32 (-3.76,4.39)    | -4.95 (-8.29,-1.61)  |
| Fine Motor               | All    | -0.51 (-4.81,3.78)   | -5.24 (-8.89,-1.59)    | -6.96 (-11.97,-1.96)  | -3.31 (-7.54,0.91)    | -7.09 (-11.07,-3.1)   | 0 (-4.69,4.7)        | -0.47 (-3.99,3.05)   | -3.62 (-8.0,7.4)      | -1.39 (-6.09,3.31)   | -4.18 (-9.22,0.86)   |
| Fine Motor               | Female | -1.05 (-6.68,4.58)   | -4.39 (-8.67,-0.12)    | -4.58 (-11.81,2.66)   | -3.95 (-8.77,0.88)    | -6.99 (-11.56,-2.42)  | 1.08 (-4.3,6.46)     | -1.62 (-6.03,2.79)   | -3.36 (-9.62,2.9)     | -2.76 (-8.53,3.01)   | -3.84 (-10.7,3)      |
| Fine Motor               | Male   | 0.68 (-6.96,8.31)    | -7.94 (-15.29,-0.6)    | -8.53 (-15.89,-1.15)  | -1.31 (-10.58,7.96)   | -8.76 (-17.39,-0.12)  | -1.78 (-11.74,8.2)   | 0.84 (-6.24,7.92)    | -4.67 (-11.52,2.19)   | 0.37 (-8.49,9.22)    | -5.66 (-13.69,2.37)  |
| Gross Motor              | All    | 1.2 (-3.54,5.93)     | -1.07 (-5.28,3.15)     | -3.65 (-9.27,1.98)    | -3.44 (-8.11,1.23)    | -1.58 (-6.29,3.14)    | -2.13 (-7.34,3.07)   | 1.07 (-2.74,4.88)    | -1.75 (-6.66,3.16)    | 1.55 (-3.66,6.77)    | -1.48 (-7.01,4.05)   |
| Gross Motor              | Female | -2.26 (-8.68,4.16)   | -0.67 (-5.74,4.42)     | -4.41 (-12.13,3.32)   | -2.69 (-8.28,2.9)     | -3.73 (-9.39,1.93)    | -3.83 (-9.97,2.33)   | -2.61 (-7.61,2.39)   | -2.33 (-9.55,4.87)    | -2.1 (-8.72,4.51)    | 3.49 (-3.83,10.81)   |
| Gross Motor              | Male   | 4.68 (-2.83,12.19)   | -4.57 (-12.44,3.3)     | -3.47 (-11.83,4.9)    | -7.99 (-16.86,0.87)   | 0.46 (-8.77,9.68)     | -0.22 (-10.16,9.71)  | 8.32 (1.84,14.8)     | -2.88 (-10.2,4.44)    | 5.25 (-3.8,14.31)    | -6.47 (-14.91,1.97)  |
| <b>Cognitive Domain</b>  | All    | 0.19 (-2.97,3.34)    | -3.24 (-5.84,-0.64)    | -5.61 (-9.04,-2.18)   | -1.65 (-4.59,1.29)    | -4.69 (-7.47,-1.9)    | -1.58 (-4.81,1.65)   | 0.29 (-2.08,2.65)    | -3.08 (-6.05,-0.12)   | -1.98 (-5.22,1.25)   | -2.76 (-6.77,1.26)   |
| <b>Cognitive Domain</b>  | Female | 0.59 (-3.24,4.42)    | -0.38 (-3.1,2.33)      | -1.75 (-6.32,2.82)    | 0.16 (-2.72,3.04)     | -3.1 (-5.94,-0.26)    | -1.33 (-4.47,1.81)   | -0.71 (-3.31,1.9)    | -2.69 (-6.44,1.06)    | -1.32 (-4.72,2.09)   | -1.45 (-7.17,4.27)   |
| <b>Cognitive Domain</b>  | Male   | 0.16 (-5.7,6.03)     | -9.85 (-14.89,-4.81)   | -8.65 (-13.98,-3.31)  | -7.48 (-14.79,-0.18)  | -10.22 (-16.32,-4.12) | -1.38 (-9.24,6.48)   | 1.61 (-4.12,7.33)    | -3.44 (-8.64,1.76)    | -2.91 (-9.85,4.03)   | -3.63 (-10.16,2.89)  |
| Attention and Memory     | All    | -0.68 (-7.78,6.4)    | -5.03 (-11.2,1.15)     | -10.55 (-18.43,-2.66) | -1.37 (-8.01,5.28)    | -7.13 (-13.74,-0.5)   | -3.25 (-10.28,3.78)  | -0.69 (-6.4,6.2)     | -6.07 (-12.88,0.72)   | -2.6 (-9.88,4.7)     | -5.44 (-13.99,3.13)  |
| Attention and Memory     | Female | -0.86 (-9.71,7.99)   | 1.12 (-5.55,7.77)      | 0.62 (-9.54,10.78)    | 1.14 (-5.89,8.18)     | -3.56 (-10.79,3.67)   | -0.82 (-8.21,6.59)   | -1.88 (-8.01,4.25)   | -3.87 (-12.91,5.17)   | -0.07 (-8.29,8.14)   | -1.42 (-12.35,9.54)  |
| Attention and Memory     | Male   | -1.36 (-13.71,11)    | -20.2 (-31.48,-8.92)   | -18.99 (-30.42,-7.55) | -11.14 (-25.55,3.28)  | -20.68 (-33.59,-7.78) | -7.18 (-22.37,8.02)  | -0.24 (-11.83,11.34) | -7.65 (-18.78,3.48)   | -6.57 (-20.99,7.85)  | -8.49 (-22.59,5.6)   |
| Perception and Concepts  | All    | 2.89 (-4.69,10.49)   | -7.61 (-14.02,-1.18)   | -11.37 (-19.8,-2.95)  | -3.16 (-10.3,3.99)    | -9.03 (-15.96,-2.1)   | -4.72 (-12.45,3)     | 4.79 (-0.83,10.42)   | -5.28 (-12.55,1.99)   | -2.78 (-10.55,4.97)  | -2.44 (-11.73,6.84)  |
| Perception and Concepts  | Female | 2.19 (-6.43,10.82)   | -0.13 (-6.28,6.03)     | -1.22 (-10.5,8.06)    | 1.59 (-4.87,8.04)     | -4.8 (-11.41,1.82)    | -1.99 (-9.13,5.16)   | 1.66 (-4.2,7.52)     | -0.76 (-9.42,7.91)    | -1.5 (-9.21,6.21)    | 0.76 (-9.31,10.82)   |
| Perception and Concepts  | Male   | 2.18 (-11.83,16.19)  | -22.97 (-35.68,-10.25) | -18.69 (-32.41,-4.97) | -15.58 (-32.7,1.53)   | -22.25 (-37.05,-7.45) | -7.85 (-25.59,9.89)  | 5.01 (-8.16,18.18)   | -9.26 (-21.83,3.3)    | -5.28 (-21.73,11.19) | -6.17 (-22.54,10.21) |

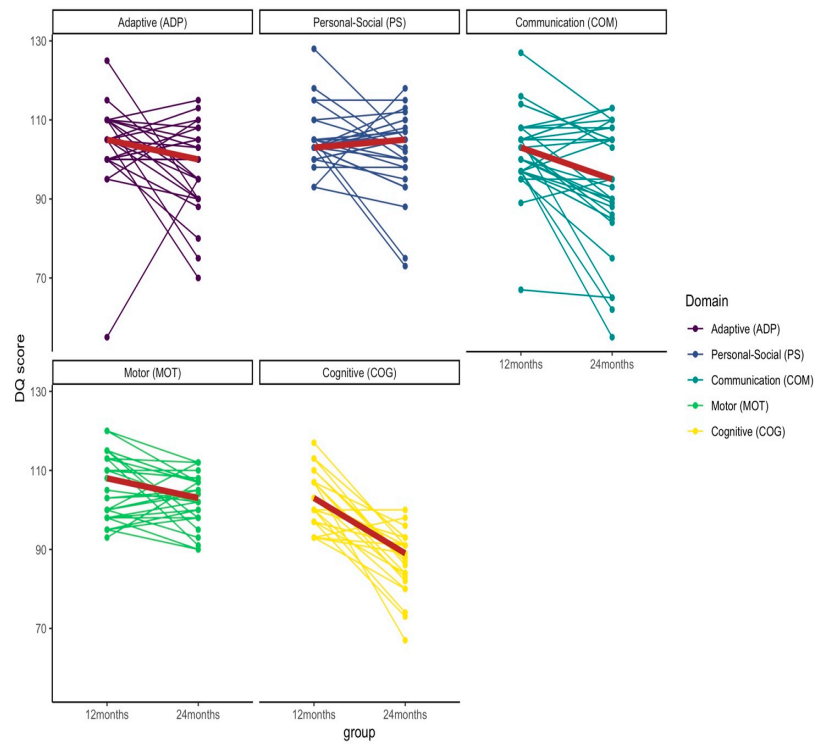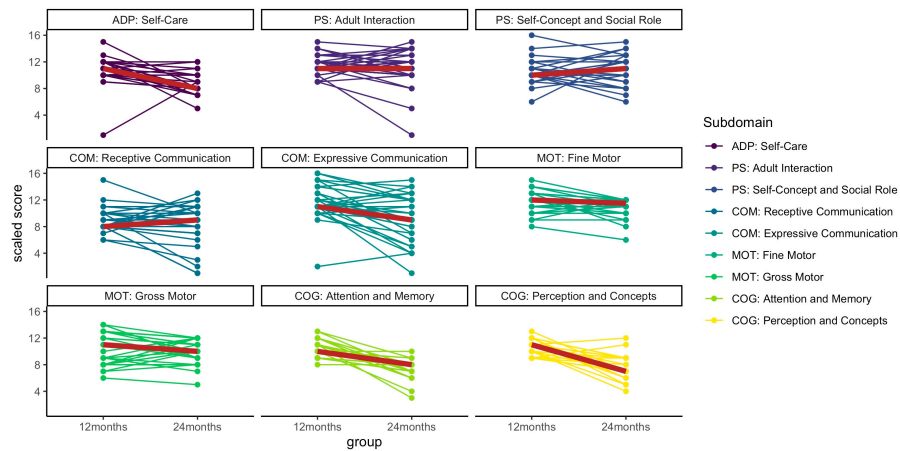

**Figure S2.** Spaghetti plots of the change of BDI Domain/Subdomain score of children whose score were reported twice (at age 12 months and 24 months) during the study period. Brown solid lines indicate the median change of score.
